# Supplementary material
Source: PubMed Central journal article supplement (PMC7127865)

**Supplemental Table 1**

The list of radiomic features consistent with CCC > 0.9, > 0.85, > 0.8 across all six sets of analyses for pancreatic parenchyma

| CCC>0.9 | CCC>0.85           | CCC>0.8            |
|---------|--------------------|--------------------|
| RLM4    | EquivalentDiameter | EquivalentDiameter |
| FD1_3   | minorAxis          | minorAxis          |
| FD1_6   | RLM4               | RLM4               |
| FD1_9   | RLM5               | RLM5               |
| FD1_12  | FD1_3              | LBP75              |
| FD1_27  | FD1_6              | LBP76              |
| FD1_30  | FD1_9              | FD1_3              |
| FD1_33  | FD1_12             | FD1_4              |
| FD1_36  | FD1_15             | FD1_6              |
| FD1_39  | FD1_27             | FD1_7              |
|         | FD1_30             | FD1_9              |
|         | FD1_33             | FD1_12             |
|         | FD1_36             | FD1_15             |
|         | FD1_39             | FD1_25             |
|         |                    | FD1_27             |
|         |                    | FD1_28             |
|         |                    | FD1_30             |
|         |                    | FD1_31             |
|         |                    | FD1_33             |
|         |                    | FD1_36             |
|         |                    | FD1_39             |

Abbreviations: RLM; run length matrix, LBP; local binary pattern, FD; fractal dimension

Supplemental Figure 1

1aA

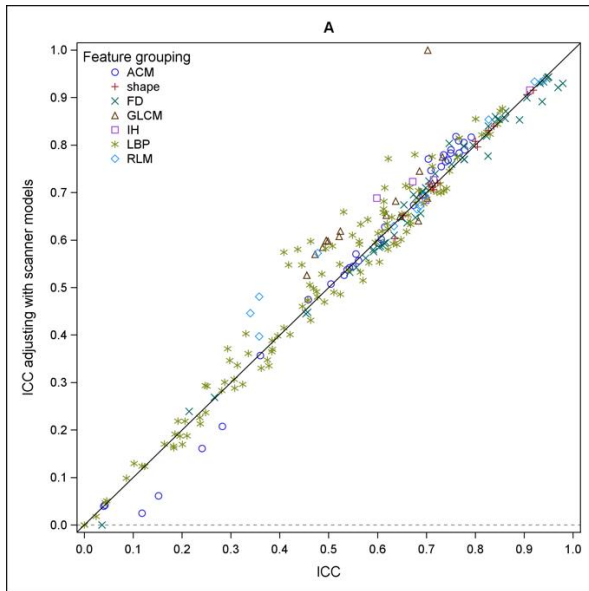

1aB

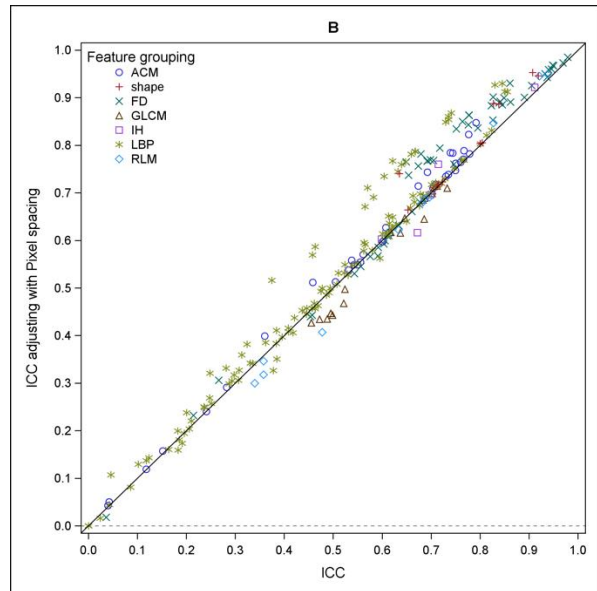

1aC

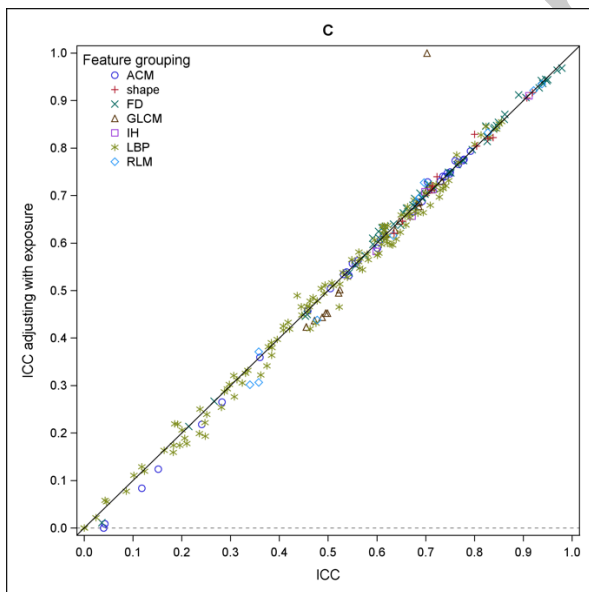

1aD

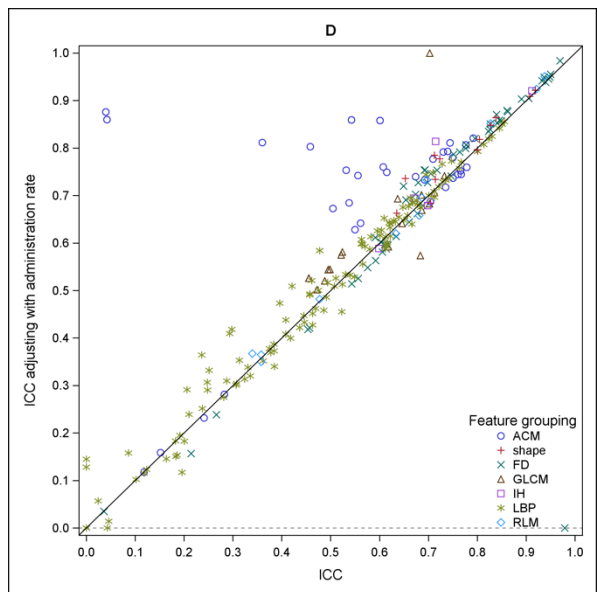

1bA

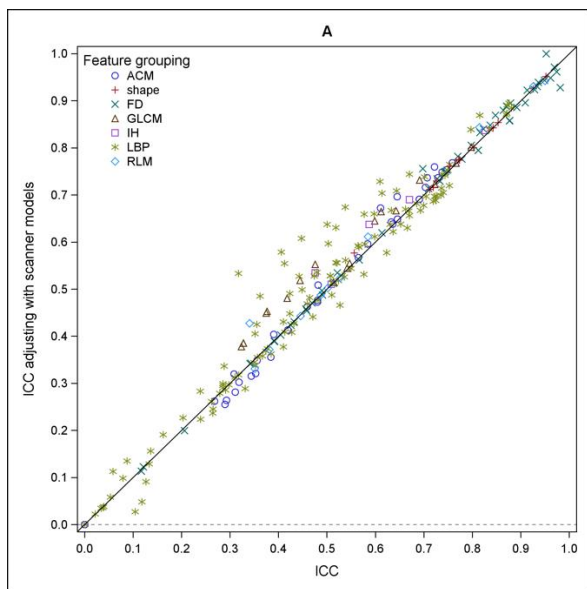

1bB

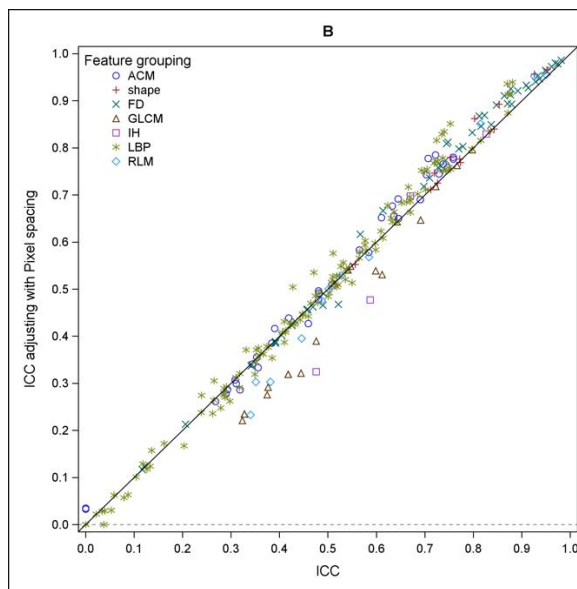

1bC

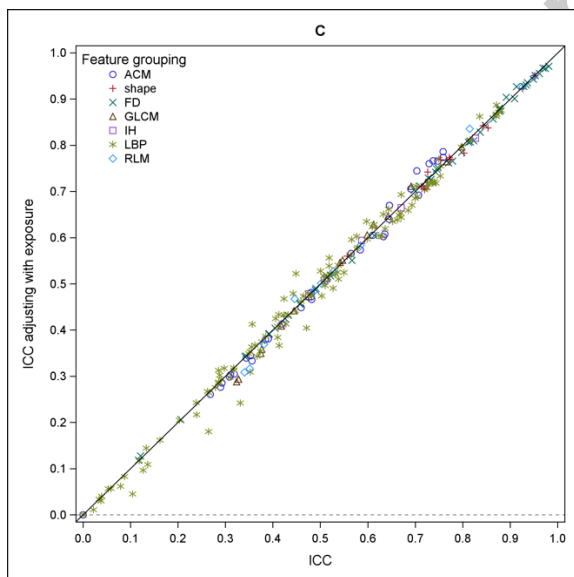

1bD

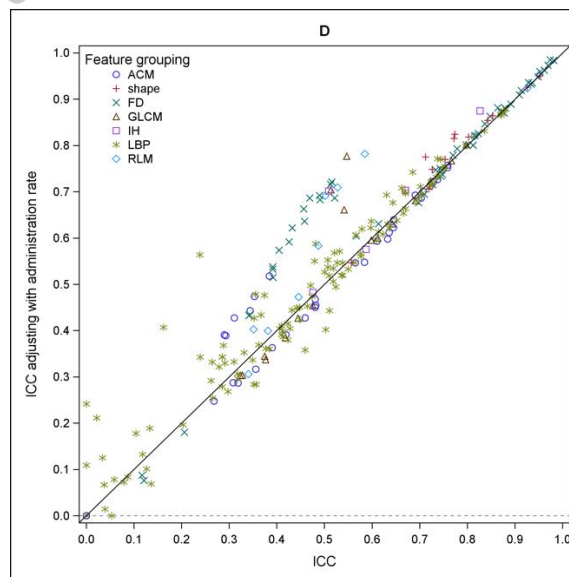

Scatter plots for unadjusted and adjusted ICC according to radiomic feature groups for R1S1/S2 (a) and R2S1/S2 (b) with scanner model (A), pixel spacing (B), exposure (C), and administration rate (D). The total number of features examined is 266.

Abbreviations: ICC; intraclass correlation coefficient, GLCM; gray-level co-occurrence matrix, RLM; run length matrix, IH; intensity histogram, LBP; local binary pattern, FD; fractal dimension, ACM; angle co-occurrence matrix, R1S1/S2; reader 1 on scan 1 vs reader 1 on scan 2, R2S1/S2; reader 2 on scan 1 vs reader 2 on scan 2

### Supplemental Figure 2

Images show examples of pancreatic tumors with high (upper row) and intermediate (lower row) Dice coefficients between the radiologists. The radiologists' contours are overlaid on representative axial CT images.

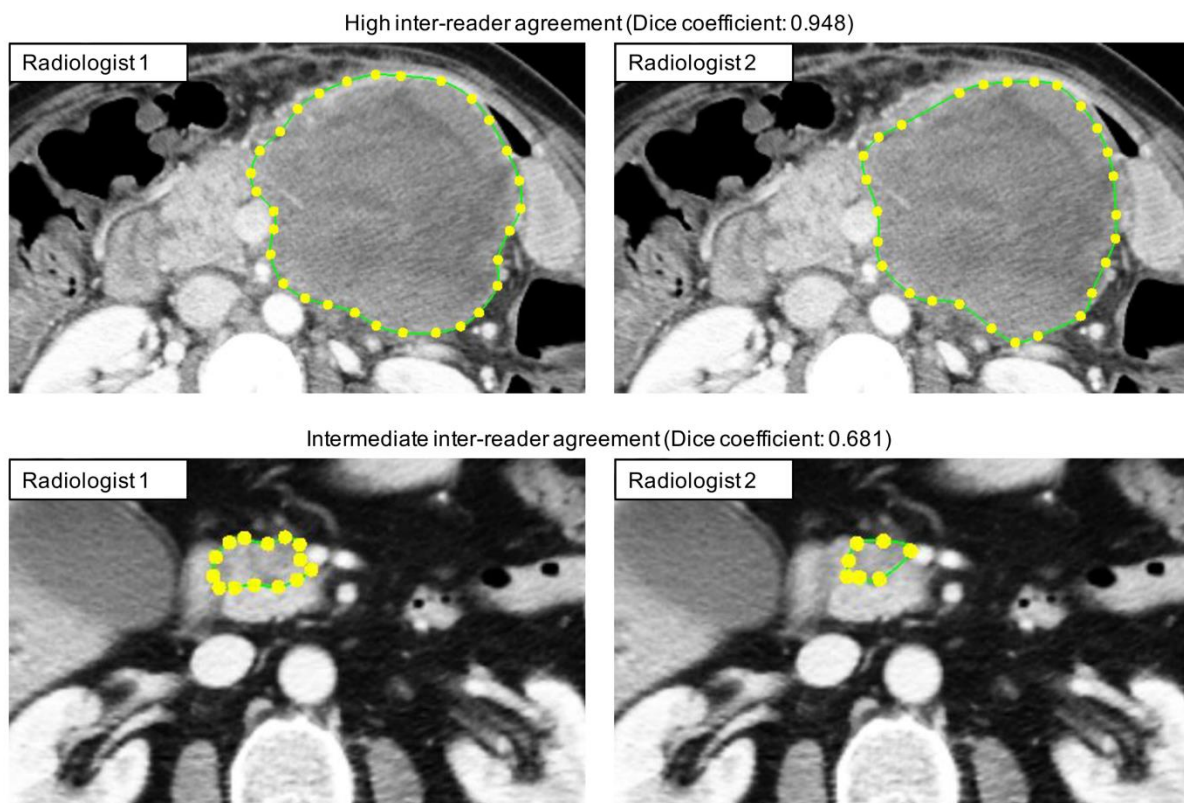

Supplement: NIHMS1562620-supplement-1.pdf [file NIHMS1562620-supplement-1.pdf]
